# Supplementary material
Source: publisher figshare collection journal article supplement (https://acs.figshare.com/ndownloader/files/4693033)
Supplement: Supplementary file 1 [file 4693033]

## Supporting Material

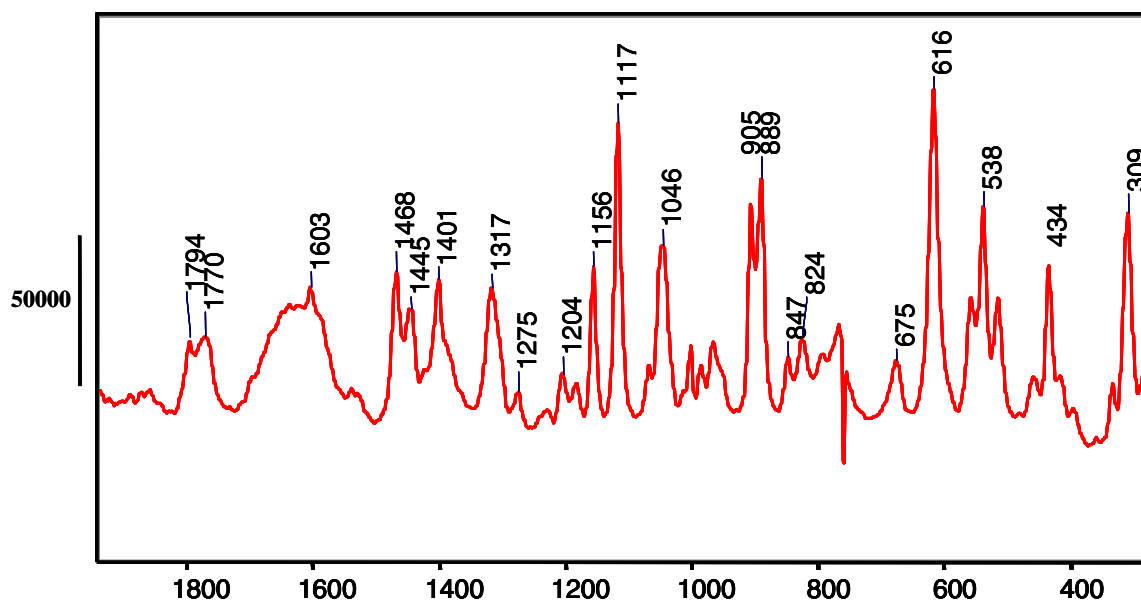

Figure 1: Raman spectrum of 6, 6 dideuterated sulbactam 20 mM in HEPES buffer 0.1M, pH 7

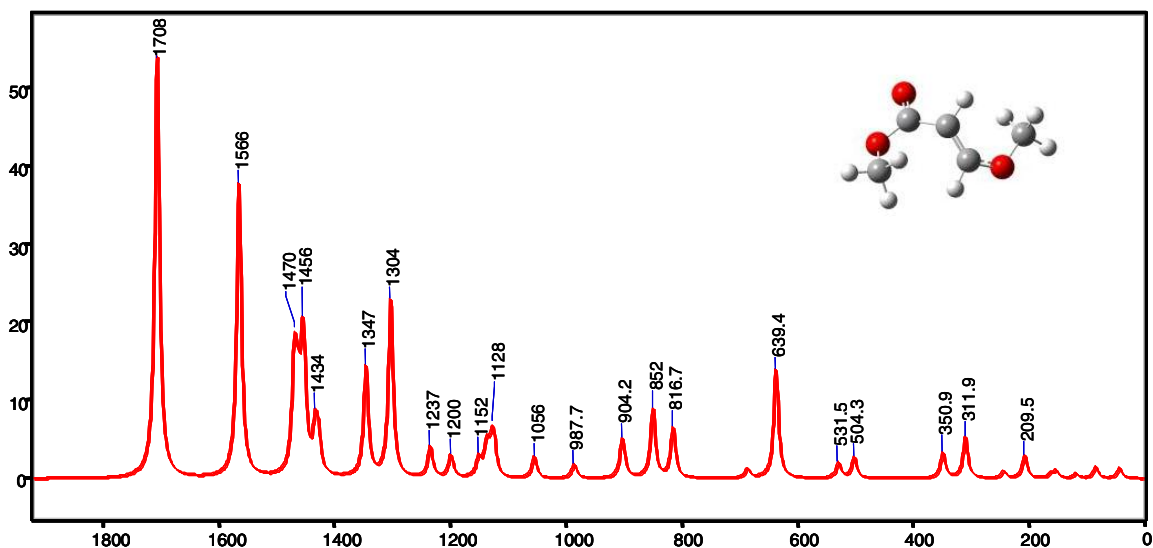

Figure 2: Calculated Raman spectrum of methyl 3-methoxyacrylate (species 5 in Scheme I), obtained by using the Gaussian 03 software, where the most intense features are detailed in parenthesis (1708  $\text{cm}^{-1}$  C=O and C-H stretch, 1566  $\text{cm}^{-1}$  C=C stretch and delocalized motion over the entire chain, 1470  $\text{cm}^{-1}$  C-H bending and stretching over the entire chain, 1304  $\text{cm}^{-1}$  C=C and C=O stretch, C-H bending)

| Calculated Raman $\nu/\text{cm}^{-1}$ for<br><b>CH<sub>3</sub>OCHCHCOOCH<sub>3</sub>/</b><br><b>CH<sub>3</sub>OCHCDCOOCH<sub>3</sub>-intensities are</b><br><b>shown in parenthesis</b> | Assignment                                                                                      |
|-----------------------------------------------------------------------------------------------------------------------------------------------------------------------------------------|-------------------------------------------------------------------------------------------------|
| <b>1707 (54)/1705 (53)</b>                                                                                                                                                              | C=O stretch, CH wagging                                                                         |
| <b>1566 (37)/1551(45)</b>                                                                                                                                                               | C=C, COO <sup>-</sup> stretching, delocalized stretching over the entire chain                  |
| <b>1470(14)/1470(13)</b>                                                                                                                                                                | CH wagging from the methyl groups                                                               |
| <b>1347 (14) /1344(19)</b>                                                                                                                                                              | CH <sub>3</sub> , CH wagging from C <sub>3</sub> , delocalized stretching over the entire chain |
| <b>1304 (22)</b>                                                                                                                                                                        | CH wagging from the C <sub>2</sub>                                                              |

## Synthesis of 6,6-Dideuteropencillanic Acid Sulfone

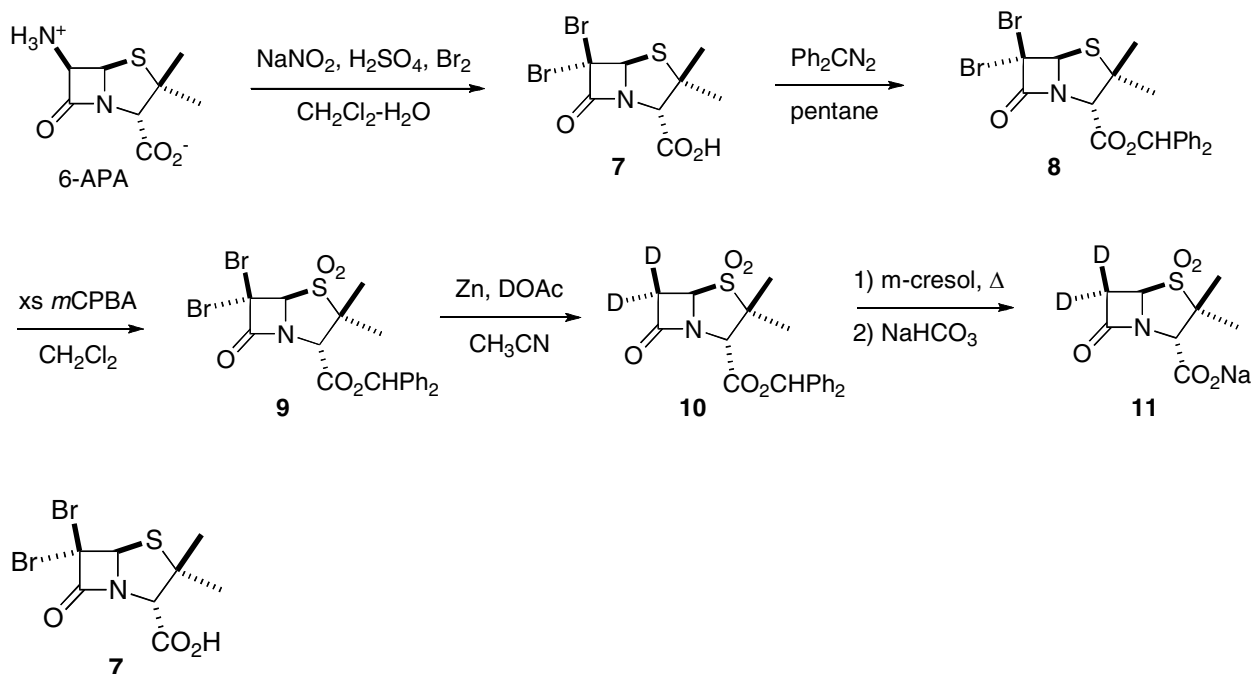

**6,6-Dibromopencillanic acid (7).** Prepared according to the procedure of Volkmann.<sup>1</sup>

To a 3 L three-necked flask equipped with an overhead stirrer and thermometer was added  $\text{CH}_2\text{Cl}_2$  (1.5 L) and the contents cooled to approx 5 °C. To the solvent was then added  $\text{Br}_2$  (359.7 g, 115.5 mL, 2.25 mol),  $\text{H}_2\text{SO}_4$  (2.5 N, 600 mL, 1.5 mol), and  $\text{NaNO}_2$  (103.5 g, 1.5 mol). Some foaming was observed after the addition of the  $\text{NaNO}_2$ . 6-APA (162 g, 0.75 mol) was then added portion wise over a period of 30 min while maintaining the reaction temperature between 4 to 10 °C. The resultant dark red solution was stirred at 5 °C for 30 min. A solution of aq  $\text{NaHSO}_3$  (1M, 1.23 L) was added dropwise at 5 to 15 °C over a period of 20 min until the color became light yellow. The organic layer was

(<sup>1</sup>) Volkmann, R. A.; Carroll, R. D.; Drolet, R. B.; Elliott, M. L.; Moore, B. S. (1982) Efficient Preparation of 6,6-Dihalopencillanic Acids. Synthesis of Penicillanic Acid *S*, *S*-Dioxide (Sulbactam) *J. Org. Chem.*, 47, 3344-3345.

separated and the aqueous layer extracted with additional  $\text{CH}_2\text{Cl}_2$  (2 x 400 mL). The combined organic extracts were washed with brine (2 x 600 mL), dried over  $\text{Na}_2\text{SO}_4$ , and concentrated to give 229 g of crude product (crude yield = 85%). This material was utilized in the following reactions without further purification.  $^1\text{H}$  NMR (400 MHz,  $\text{CDCl}_3$ ):  $\delta$  1.25 (s, 3H), 1.59 (s, 3H), 4.62 (s, 1H), 5.82 (s, 1H), 6.93 (s, 1H), 7.33 - 7.36 (m, 10H).

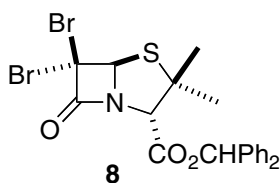

**Benzhydryl 6,6-dibromopenicillinate (8).** To a solution of 6,6-dibromopenicillanic acid, (420 g, 1.17 mol) in acetone (2 L) at 0 °C was added a solution of diphenyldiazomethane (250 g, 1.23 mol) in acetone (500 mL), and the resultant mixture was mechanically stirred for 20 h at rt. The solvent was then removed in vacuo and the resultant residue was purified by flash chromatography on silica gel (15%  $\text{CH}_2\text{Cl}_2$ /hexane) to produce pure benzhydryl ester (90% yield).  $^1\text{H}$  NMR (400 MHz,  $\text{CDCl}_3$ )  $\delta$  7.36 (10H, m, Ar), 6.95 (1H, s,  $\text{CHPh}_2$ ), 5.84 (1H, s, C5 CH), 4.63 (1H, s, C3 CH), 1.62 (1H, s, Me), 1.28 (1H, s, Me).

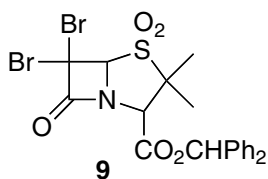

**Benzhydryl 6,6-dibromopenicillinate sulfone (9).** To a solution of sulfide (10.0 g, 19.04 mmol) in dichloromethane (100 mL) was added *m*CPBA (13.09 g, 76.16 mmol), then the reaction mixture was stirred at room temperature for 12 h. Sodium metabisulfite (10.0 g in 100 mL water) solution was added to the above mixture, layers were separated, organic layer was washed with aq NaHCO<sub>3</sub>, water and brine (150 mL each). Then it was dried over Na<sub>2</sub>SO<sub>4</sub>, concentrated and purified by column chromatography using DCM as eluant to give 7.95 g of product (75% yield).

<sup>1</sup>H NMR (400 MHz, CDCl<sub>3</sub>) δ 1.12 (s, 3H), 1.58 (s, 3H), 4.60 (s, 1H), 4.99 (s, 1H), 6.96 (s, 1H), 7.31-7.39 (m, 10H).

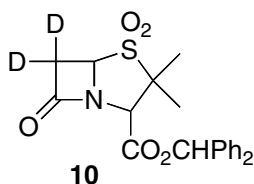

**Benzhydryl 6,6-dideuteropenicillinate sulfone (10).** To a stirred solution of dibromide **9** (1.0 g, 1.79 mmol) in acetonitrile (10 mL) at 0 °C was added AcOD (1.0 mL) and Zn powder (0.468g, 7.16 mmol) was added, the mixture was stirred at 0 °C for 1.5 h. Excess Zn was removed by filtration and the filtrate was concentrated in vacuo. The residue was dissolved in DCM, washed successively with brine and dilute aq NaHCO<sub>3</sub>, dried and concentrated. The residue was chromatographed on silica gel with 5% EtOAc/DCM as eluant to produce 0.429 g (60% yield) of dideuterated penicillin sulfone.

$^1\text{H}$  NMR (400 MHz,  $\text{CDCl}_3$ )  $\delta$  1.10 (s, 3H), 1.55 (s, 3H), 4.49 (s, 1H), 4.54 (s, 1H), 6.96 (s, 1H), 7.28-7.35 (m, 10H).  $^{13}\text{C}$  NMR (100 MHz,  $\text{CDCl}_3$ ):  $\delta$  18.24, 19.52, 37.57 (quintet,  $J = 20.8$  Hz), 60.68, 62.59, 62.85, 78.8, 126.56, 127.5, 128.12, 128.47, 128.51, 128.59, 138.45, 138.68, 165.92, 170.71. IR (KBr,  $\text{cm}^{-1}$ ): 1118.76, 1185.06, 1322.75, 1455.28, 1495.18, 1755.42, 1802.1, 3583.63.

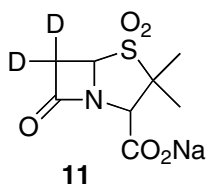

**Sodium salt of 6,6-dideuteropenicillanic acid sulfone (11).** To a solution of ester (350 mg, 0.872 mmol) in *m*-cresol (3.5 mL) was heated at 50 °C for 3 h under an argon atmosphere. The mixture was then cooled to rt, diluted with ether (10 mL) and treated with aq  $\text{NaHCO}_3$  (80.0 mg was dissolved in 5 mL of deionized water, 0.959 mmol). The separated aqueous layer was then purified on a column of CHP2OP (Mitsubishi Chemical Corporation) using deionized water as eluent and lyophilized to give 80 mg (36% yield) of pure sodium salt.

$^1\text{H}$  NMR (400 MHz,  $\text{CDCl}_3$ ):  $\delta$  1.45 (s, 3H), 1.59 (s, 3H), 4.2 (s, 1H), 4.99 (s, 1H).  $^{13}\text{C}$  NMR (100 MHz,  $\text{D}_2\text{O}$ ):  $\delta$  20.65, 22.33, 39.43, 39.68 (quintet,  $J = 24.9$  Hz), 63.93, 66.59, 68.18, 175.75, 177.84.
